# Supplementary material for: A simple one step synthesis of magnetic-optical dual functional ZIF-8 in a sodalite phase for magnetically guided targeting bioimaging and drug delivery
Source: Royal Society of Chemistry journal article supplement (doi:10.1039/d3sm01100c), 2023-01-01
Supplement: d3sm01100c1.pdf [file d3sm01100c1.pdf]

## Simple One Step Synthesis of Magnetic-optical Dual Functional ZIF-8 in Sodalite Phase for Magnetically Guided Targeting Bioimaging and Drug Delivery

Sun Xujian <sup>a,b,c,#</sup>, Yang zhichao <sup>a,b,c,#</sup>, Zhang Man <sup>a,b,c</sup>, Gao Xuechuan <sup>a,b,c \*</sup>

*a* College of Chemical Engineering, Inner Mongolia University of Technology, Hohhot 010051, China

*b* Key Laboratory of CO<sub>2</sub> Resource Utilization at Universities of Inner Mongolia Autonomous Region, Hohhot, 010051, China

*c* Inner Mongolia Engineering Research Center for CO<sub>2</sub> Capture and Utilization, Hohhot, 010051, China

Figure S1 SEM images of ZIF-8 (A, B, C)

Figure S2 SEM images of ZIF-8 (A), SEM-EDS images of ZIF-8 (B, C, D, E, F), Map Sum Spectrum of ZIF-8(G)

Figure S3 SEM-EDS images of DOX/Fe<sub>3</sub>O<sub>4</sub>@ZIF-8 (A, B, C, D, E, F), Map Sum Spectrum of DOX/Fe<sub>3</sub>O<sub>4</sub>@ZIF-8 (G)

Figure S4 (a) Raman spectra of ZIF-8; (a) Pore size distribution ZIF-8 (A) and DOX/Fe<sub>3</sub>O<sub>4</sub>@ZIF-8 (B)

Figure S5 (a) The TGA curves of ZIF-8 (A), DOX/Fe<sub>3</sub>O<sub>4</sub>@ZIF-8 (B), Fe<sub>3</sub>O<sub>4</sub> (C) and DOX (D); (b) The excitation and emission spectra of DOX/Fe<sub>3</sub>O<sub>4</sub>@ZIF-8

Figure S6 Relaxation rate  $1/T_2$  versus concentrations of Fe; T<sub>2</sub>-weighted MRI of DOX/Fe<sub>3</sub>O<sub>4</sub>@ZIF-8 with diverse Fe concentrations in vitro (the inset)

Figure S7 The magnetic hysteresis loops of DOX/Fe<sub>3</sub>O<sub>4</sub>@ZIF-8 measured at 300 K

Figure S8 The inset shows photographs of the DOX/Fe<sub>3</sub>O<sub>4</sub>@ZIF-8 dispersed in water with an external magnetic field

Figure S9 Relative quantitative analysis of Dead (a), Live (b), Late apoptosis (c) and early apoptosis (d)

Figure S10 Effect of DOX/Fe<sub>3</sub>O<sub>4</sub>@ZIF-8 on p-JNK, p-P38, p-ERK, Caspase-3, Bcl-2, and Bax HepG2 cells were treated with DOX/Fe<sub>3</sub>O<sub>4</sub>@ZIF-8 for 10 min and 4 h

Figure S11 SEM images of ZIF-8 after incubation in PBS (pH = 5) at 0 (A), 1 (B), 3

(C) days and table of N, Zn, O element content in the recovered powder after incubation in PBS (pH = 5) for (0, 1, 3) days

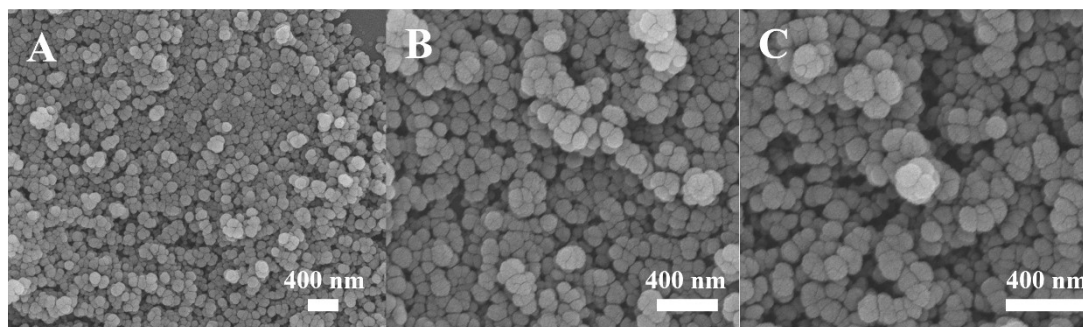

Figure S1 SEM images of ZIF-8 with different magnifications (A, B, C)

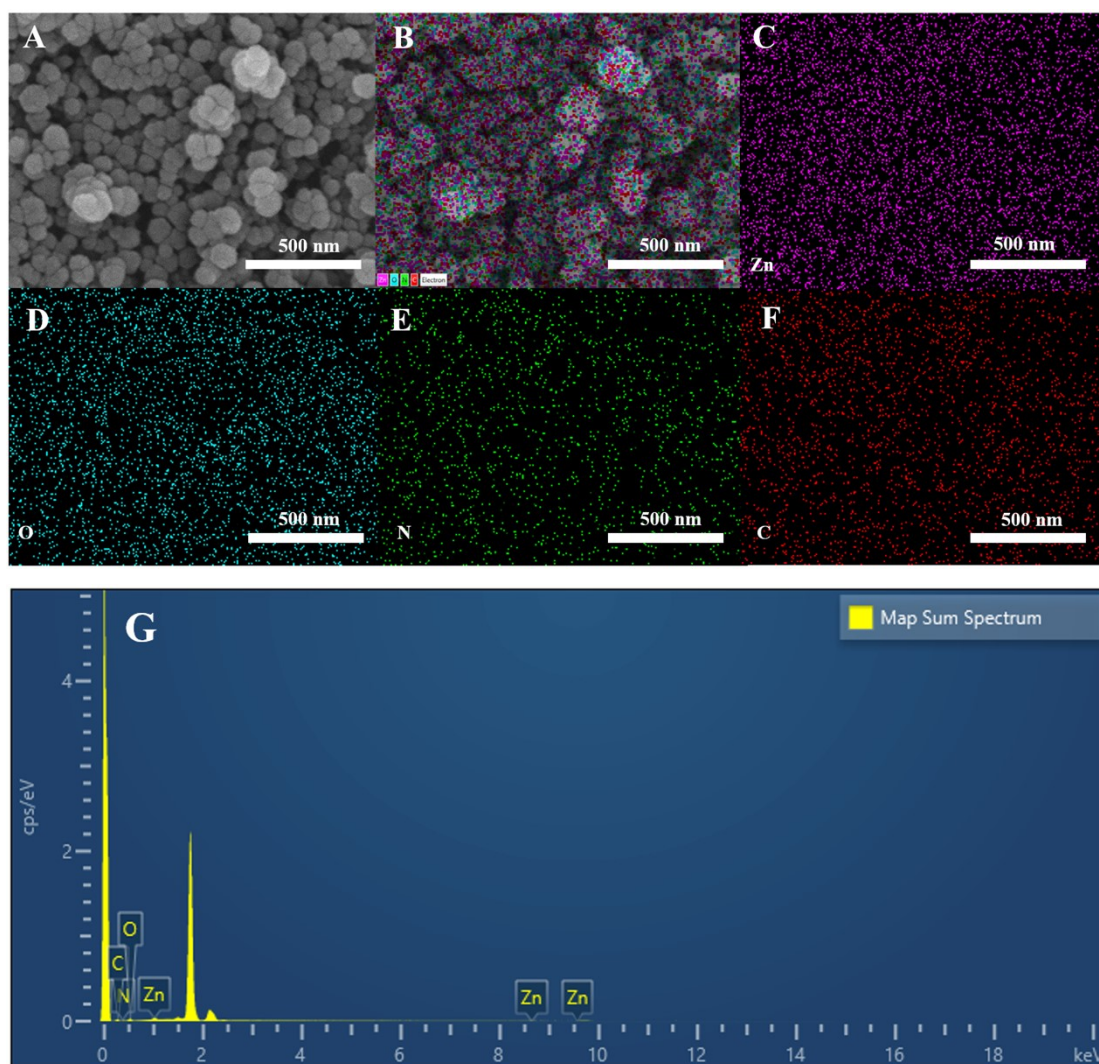

Figure S2 SEM images of ZIF-8 (A), SEM-EDS images of ZIF-8 (B, C, D, E, F), Map Sum Spectrum of ZIF-8(G)

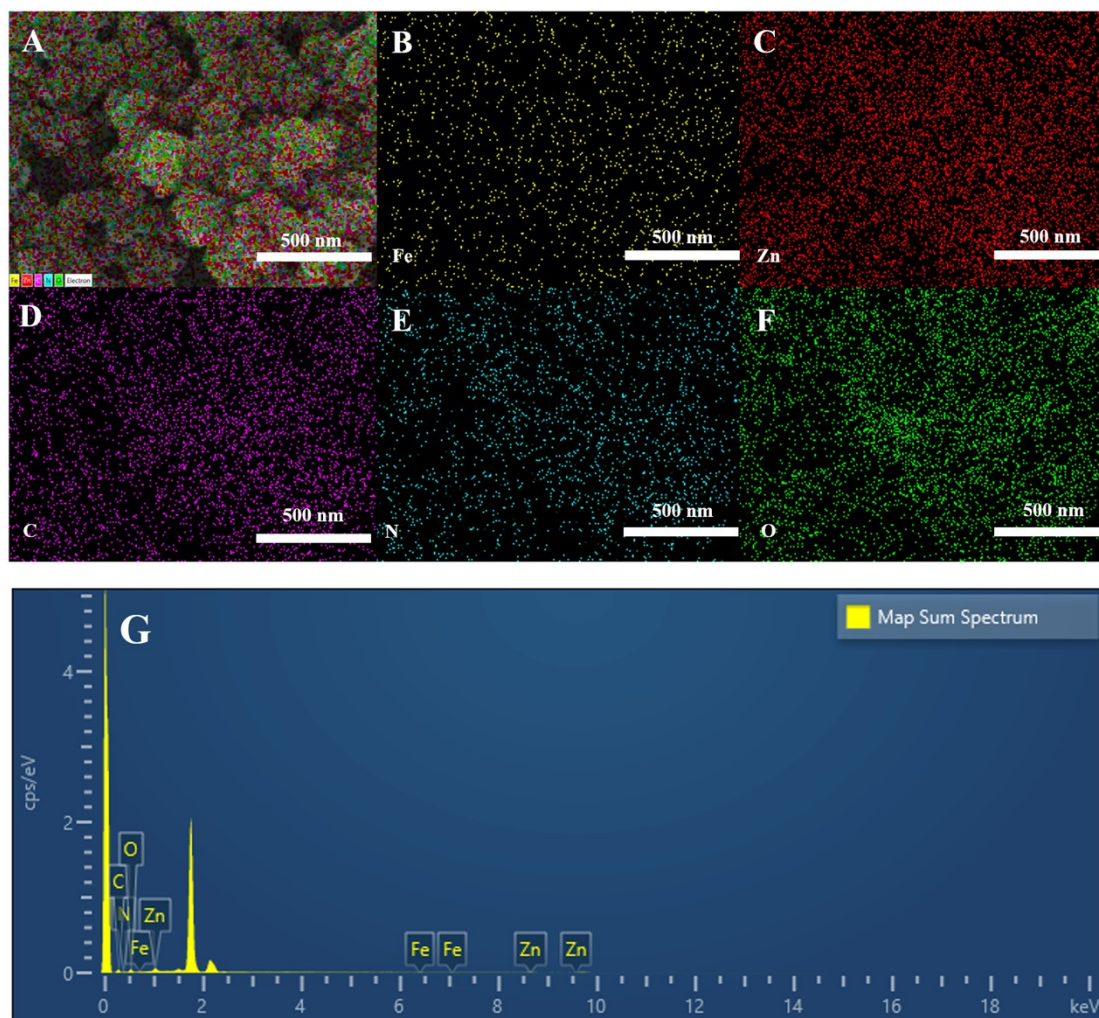

Figure S3 SEM-EDS images of DOX/Fe<sub>3</sub>O<sub>4</sub>@ZIF-8 (A, B, C, D, E, F), Map Sum Spectrum of DOX/Fe<sub>3</sub>O<sub>4</sub>@ZIF-8 (G)

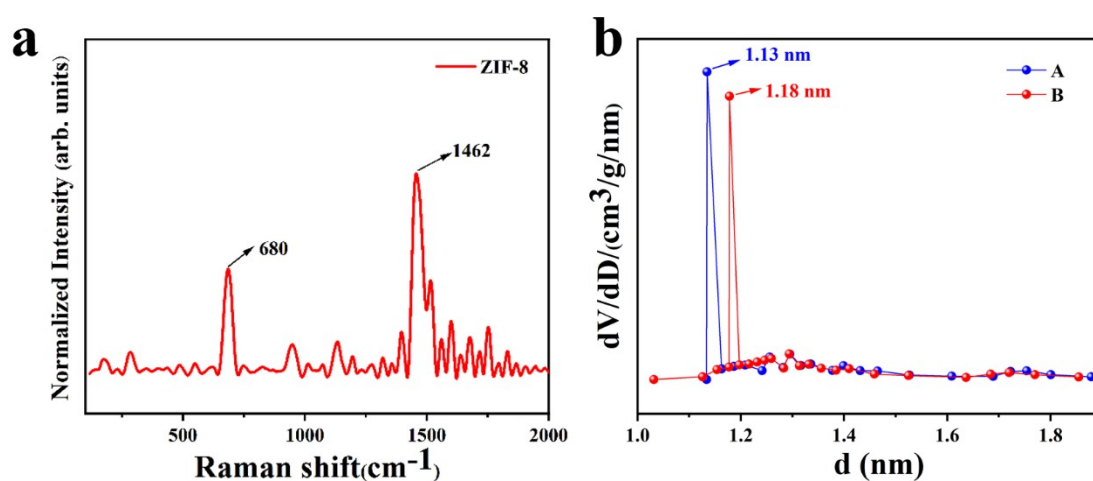

Figure S4 (a) Raman spectra of ZIF-8; (a) Pore size distribution ZIF-8 (A) and DOX/Fe<sub>3</sub>O<sub>4</sub>@ZIF-8 (B)

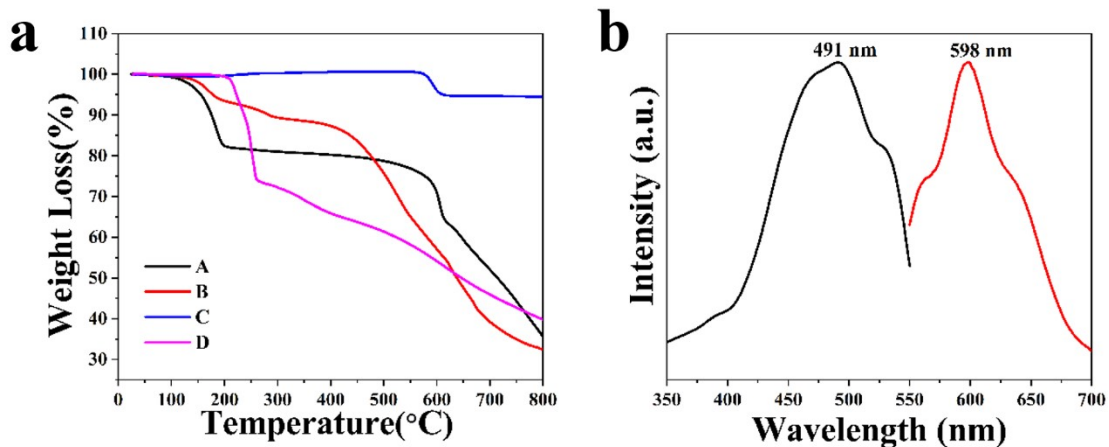

Figure S5 (a) The TGA curves of ZIF-8 (A), DOX/Fe<sub>3</sub>O<sub>4</sub>@ZIF-8 (B), Fe<sub>3</sub>O<sub>4</sub> (C) and DOX (D); (b) The excitation and emission spectra of DOX/Fe<sub>3</sub>O<sub>4</sub>@ZIF-8

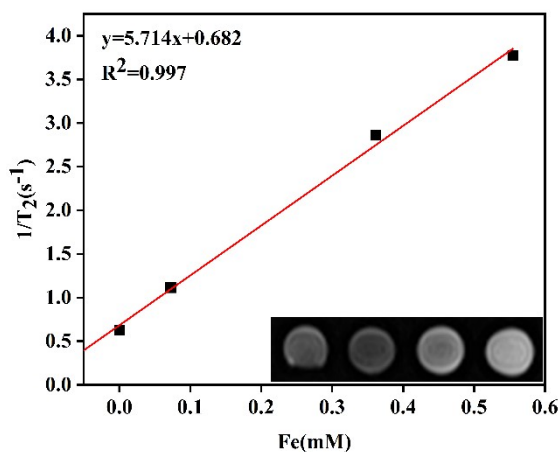

Figure S6 Relaxation rate  $1/T_2$  versus concentrations of Fe. T<sub>2</sub>-weighted MRI of DOX/Fe<sub>3</sub>O<sub>4</sub>@ZIF-8 with diverse Fe concentrations in vitro (the inset)

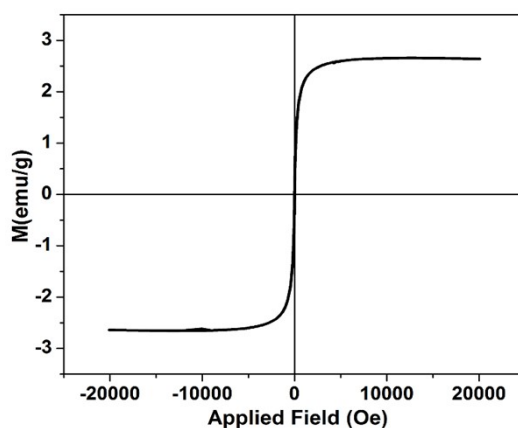

Figure S7 The magnetic hysteresis loops of DOX/Fe<sub>3</sub>O<sub>4</sub>@ZIF-8 measured at 300



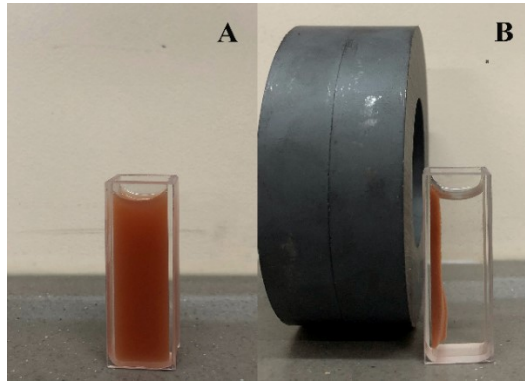

Figure S8 The inset shows photographs of the DOX/Fe<sub>3</sub>O<sub>4</sub>@ZIF-8 dispersed in water with an external magnetic field

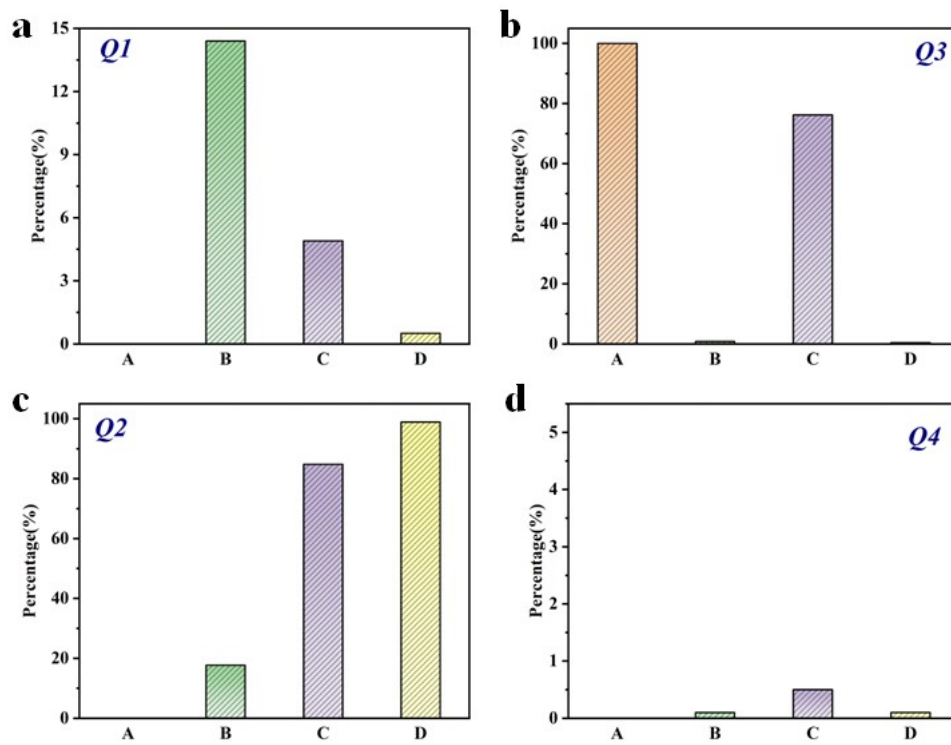

Figure S9 Relative quantitative analysis of Dead (a), Live (b), Late apoptosis (c) and early apoptosis (d)

Table S1 The percentage of Dead, Late apoptosis, Live and early apoptosis in Control, DOX, ZIF-8 and DOX/Fe<sub>3</sub>O<sub>4</sub>@ZIF-8

| Material                                  | Dead/Q1( | Late Apop/Q | Live/Q3( | Early Apop/Q |
|-------------------------------------------|----------|-------------|----------|--------------|
|                                           | %)       | 2(%)        | %)       | 4(%)         |
| Control                                   | 0        | 0           | 100      | 0            |
| ZIF-8                                     | 3.6      | 17.7        | 78.3     | 0.4          |
| DOX                                       | 4.9      | 18.4        | 76.2     | 0.5          |
| DOX/Fe <sub>3</sub> O <sub>4</sub> @ZIF-8 | 0.5      | 98.9        | 0.4      | 0.1          |

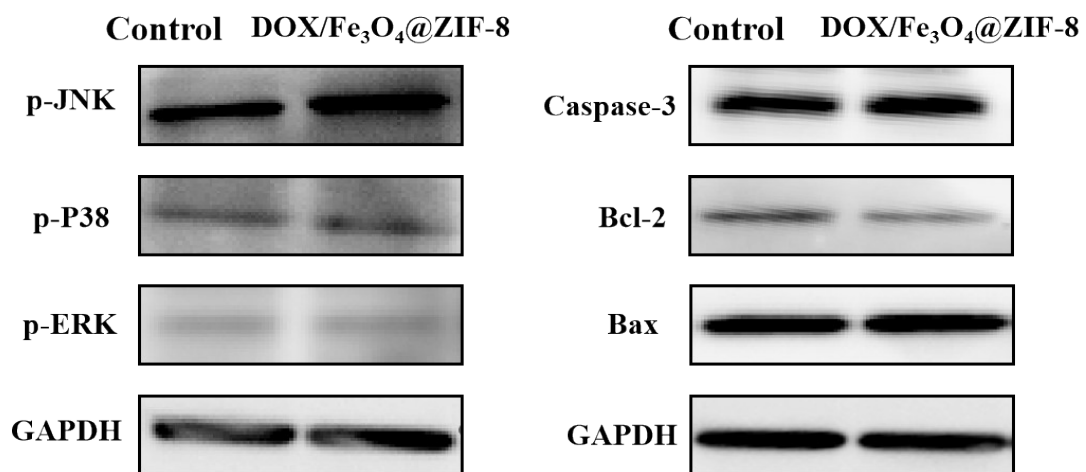

Figure S10 Effect of DOX/Fe<sub>3</sub>O<sub>4</sub>@ZIF-8 on p-JNK, p-P38, p-ERK, Caspase-3, Bcl-2, and Bax HepG2 cells were treated with DOX/Fe<sub>3</sub>O<sub>4</sub>@ZIF-8 for 10 min and 4 h

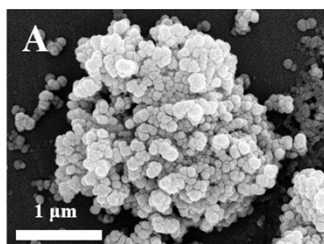

| Element   | Weight %     |
|-----------|--------------|
| <b>N</b>  | <b>25.50</b> |
| <b>O</b>  | <b>48.68</b> |
| <b>Zn</b> | <b>25.82</b> |

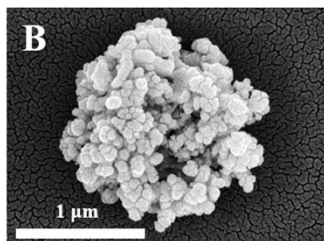

| Element   | Weight %     |
|-----------|--------------|
| <b>N</b>  | <b>5.13</b>  |
| <b>O</b>  | <b>66.01</b> |
| <b>Zn</b> | <b>28.86</b> |

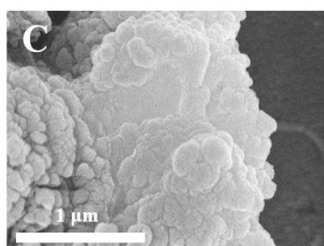

| Element   | Weight %     |
|-----------|--------------|
| <b>N</b>  | <b>0.06</b>  |
| <b>O</b>  | <b>64.31</b> |
| <b>Zn</b> | <b>35.63</b> |

Figure S11 SEM images of ZIF-8 after incubation in PBS (pH = 5) at 0 (A), 1 (B), 3 (C) days and table of N, Zn, O element content in the recovered powder after incubation in PBS (pH = 5) for (0, 1, 3) days
